# Supplementary material for: Synthesis of ZnO Hierarchical Structures and Their Gas Sensing Properties
Source: MDPI journal article supplement (doi:10.3390/nano9091277), 2019-09-07
Supplement: s1 [file s1]

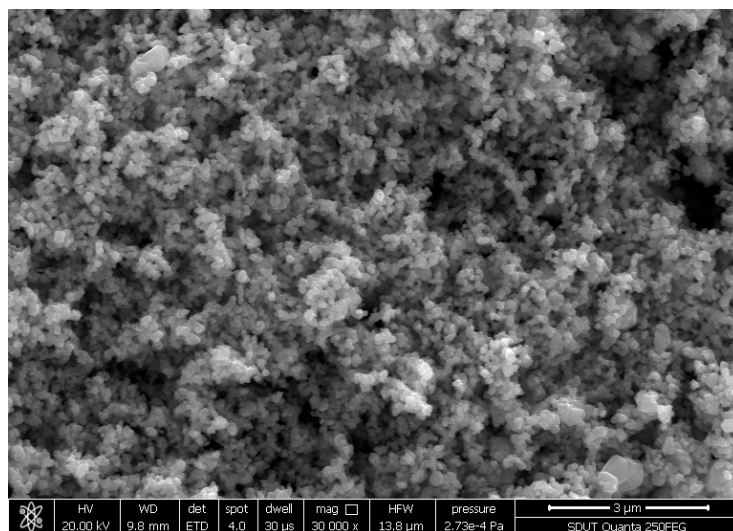

Figure S1. SEM image of as-prepared ZnO nanofibers (NFs) under 100 W sonication.

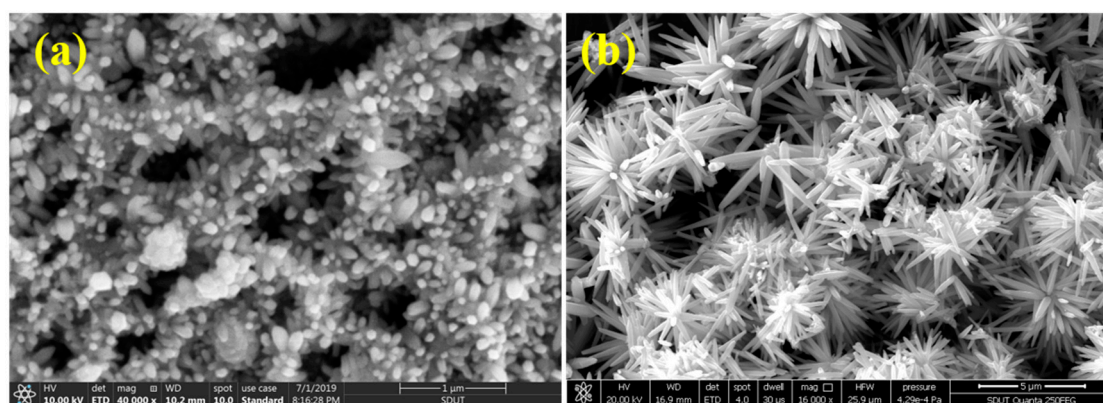

Figure S2. SEM images of as-prepared (a) ZnO HS1 sample and (b) ZnO HS2 sample after application in the gas sensing.
